# Supplementary material for: Molecular p-doping in organic liquid crystalline semiconductors: influence of the charge transfer complex on the properties of mesophase and bulk charge transport
Source: Royal Society of Chemistry journal article supplement (doi:10.1039/c9cp03076j), 2019-01-01
Supplement: c9cp03076j1.pdf [file c9cp03076j1.pdf]

## Supplementary materials

### **Molecular p-doping in organic liquid crystalline semiconductor: Influence of the charge transfer complex on the properties of mesophase and bulk charge transport**

K. Kondratenko<sup>\*a</sup>, Y. Boussoualem<sup>a</sup>, D.P. Singh<sup>a</sup>, R. Visvanathan<sup>b</sup>, A. E. Duncan<sup>b</sup>, N. A. Clark<sup>b</sup>, C. Legrand<sup>a</sup> and A. Daoudi<sup>a</sup>

<sup>a</sup>*Univ. Littoral Côte d'Opale, EA 4476 - UDSMM - Unité de Dynamique et Structure de Matériaux Moléculaires, 59140 Dunkerque, France*

<sup>b</sup>*Department of Physics and Soft Materials Research Center, University of Colorado Boulder, Boulder, CO, USA*

\* Electronic mail: kirill.kondratenko@univ-littoral.fr

## DSC thermograms

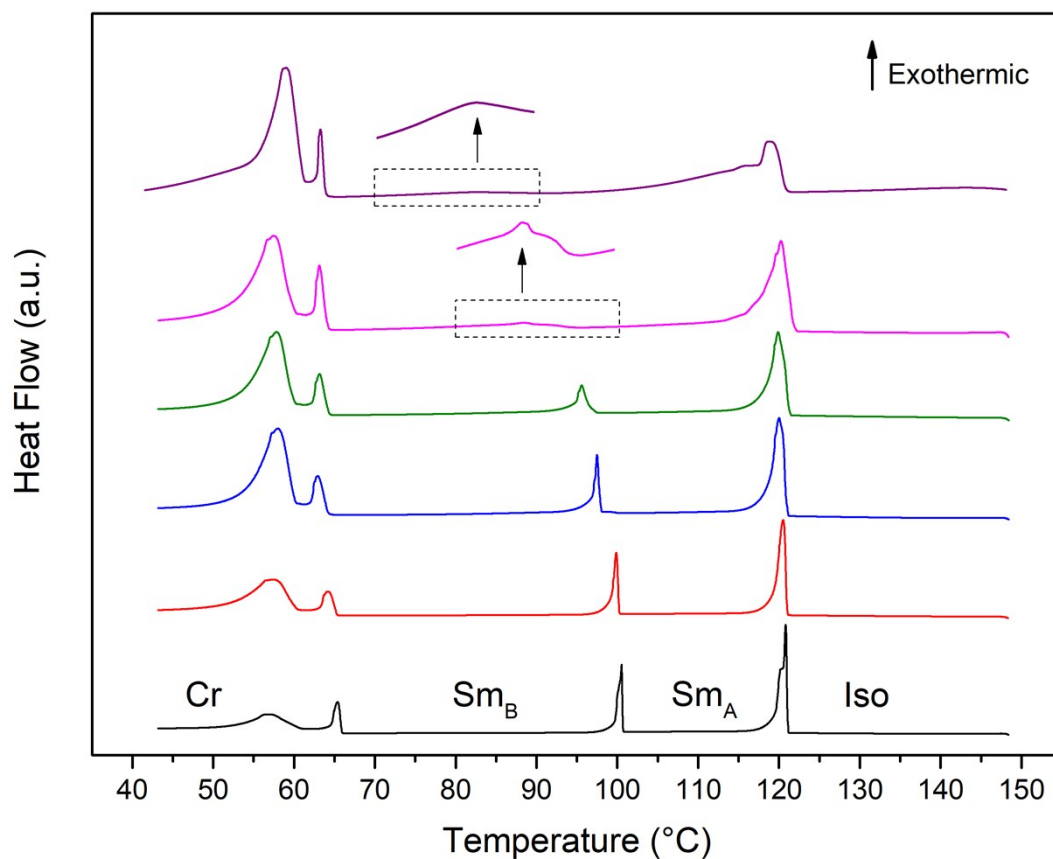

**Figure 1.** DSC plots for pure **8-PNP-O12** (black), **c1** (red), **c2** (blue), **c3** (green), **c4** (pink) composites obtained with 10°C min<sup>-1</sup> cooling program and **c5** (purple) composite obtained with 5°C min<sup>-1</sup> cooling program. Dashed rectangles denote the scaled part of the thermogram.

## Texture of prepared composites

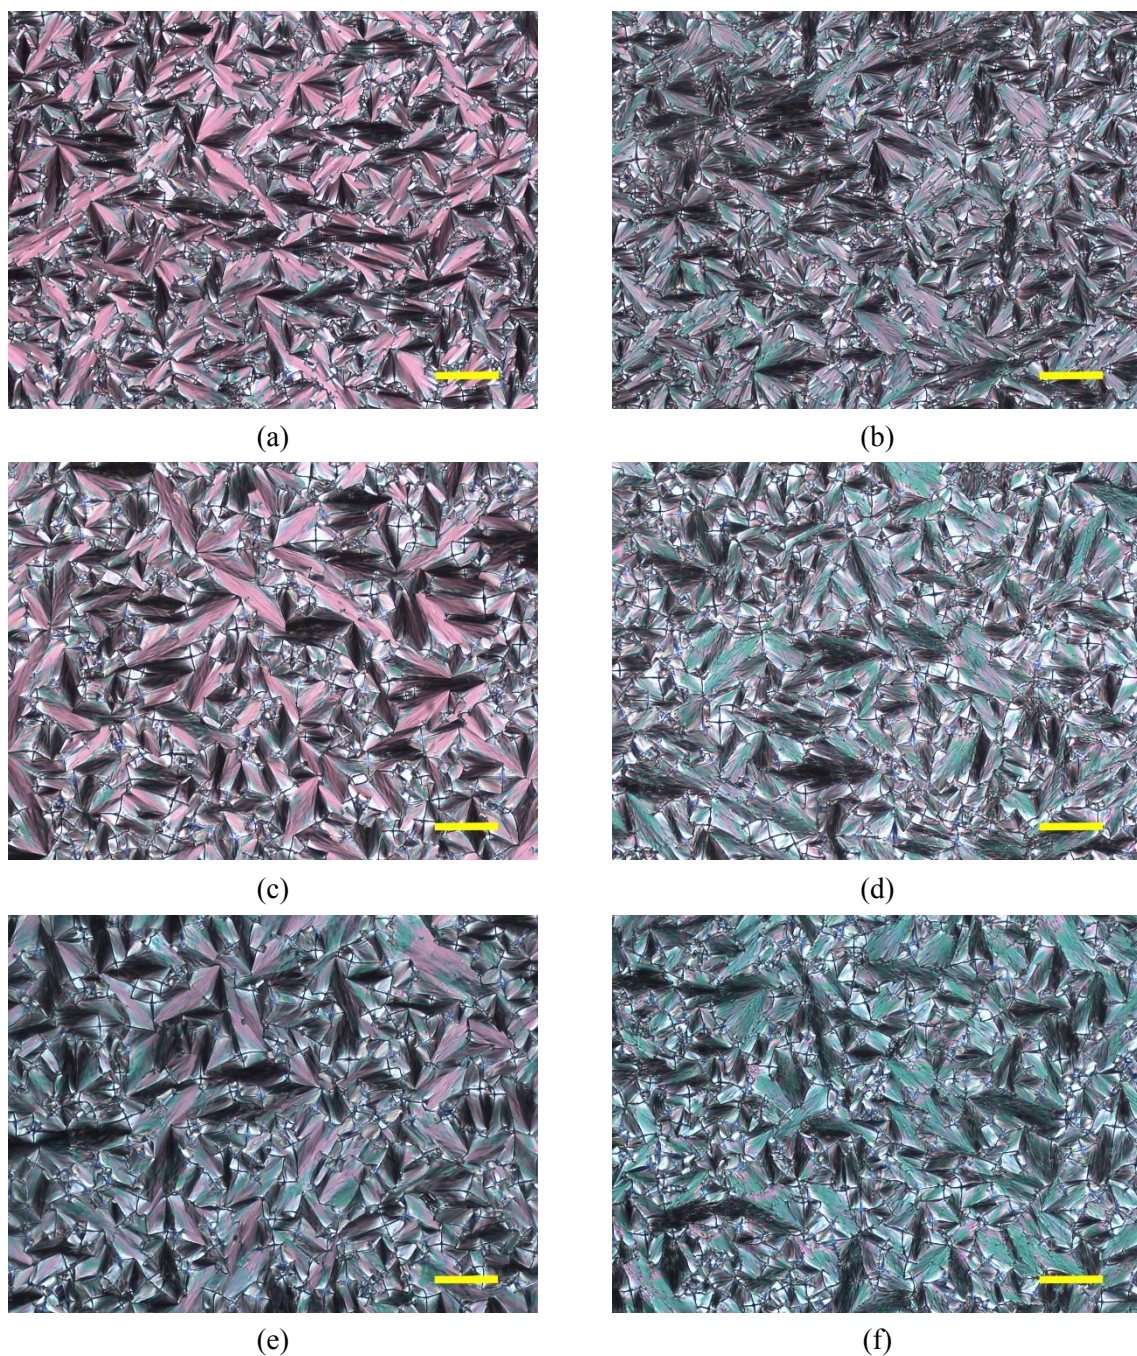

**Figure 2.1** Sample texture under crossed analyzer-polarizer: for pure **8-PNP-O12** (in  $\text{Sm}_\text{B}$  (a) and  $\text{Sm}_\text{A}$  (b) mesophase), **c1** (in  $\text{Sm}_\text{B}$  (c) and  $\text{Sm}_\text{A}$  (d) mesophase) and **c2** (in  $\text{Sm}_\text{B}$  (e) and  $\text{Sm}_\text{A}$  (f) mesophase). Scale bar represents 100 $\mu\text{m}$ .



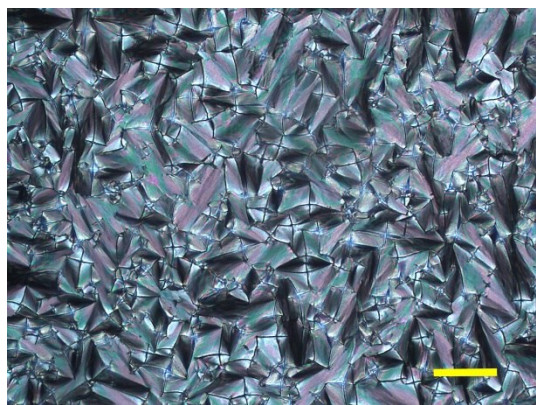

(g)

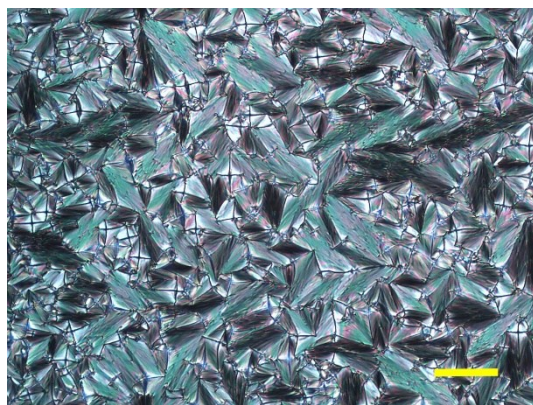

(h)

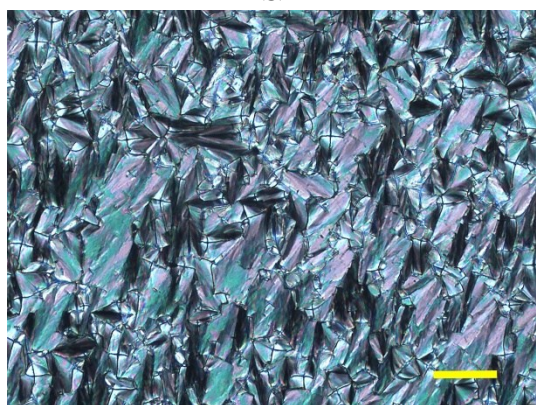

(i)

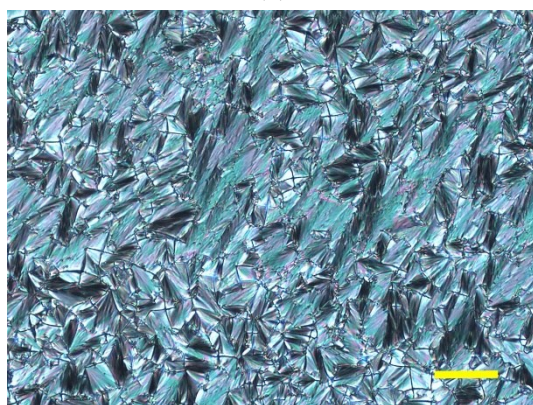

(k)

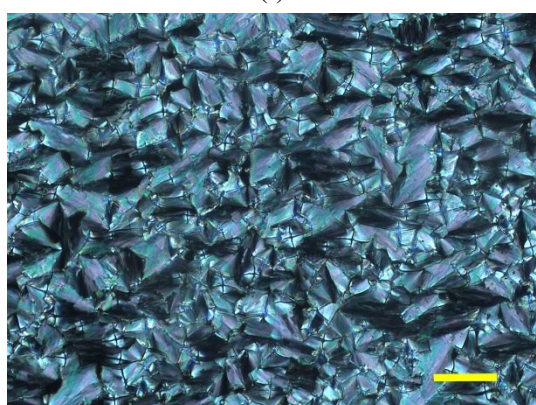

(l)

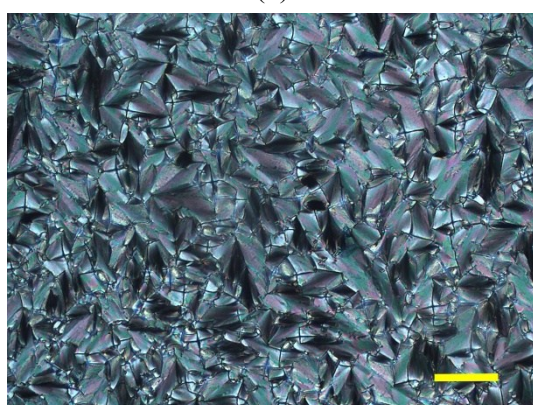

(m)

**Figure 2.2** Sample texture under crossed analyzer-polarizer: **c3** (in **Sm<sub>B</sub>** (g) and **Sm<sub>A</sub>** (h) mesophase), **c4** (in **Sm<sub>B</sub>** (i) and **Sm<sub>A</sub>** (k) mesophase), and **c5** (in **Sm<sub>B</sub>** (l) and **Sm<sub>A</sub>** (m) mesophase). Scale bar represents 100μm.

## Wide angle X-ray scattering data

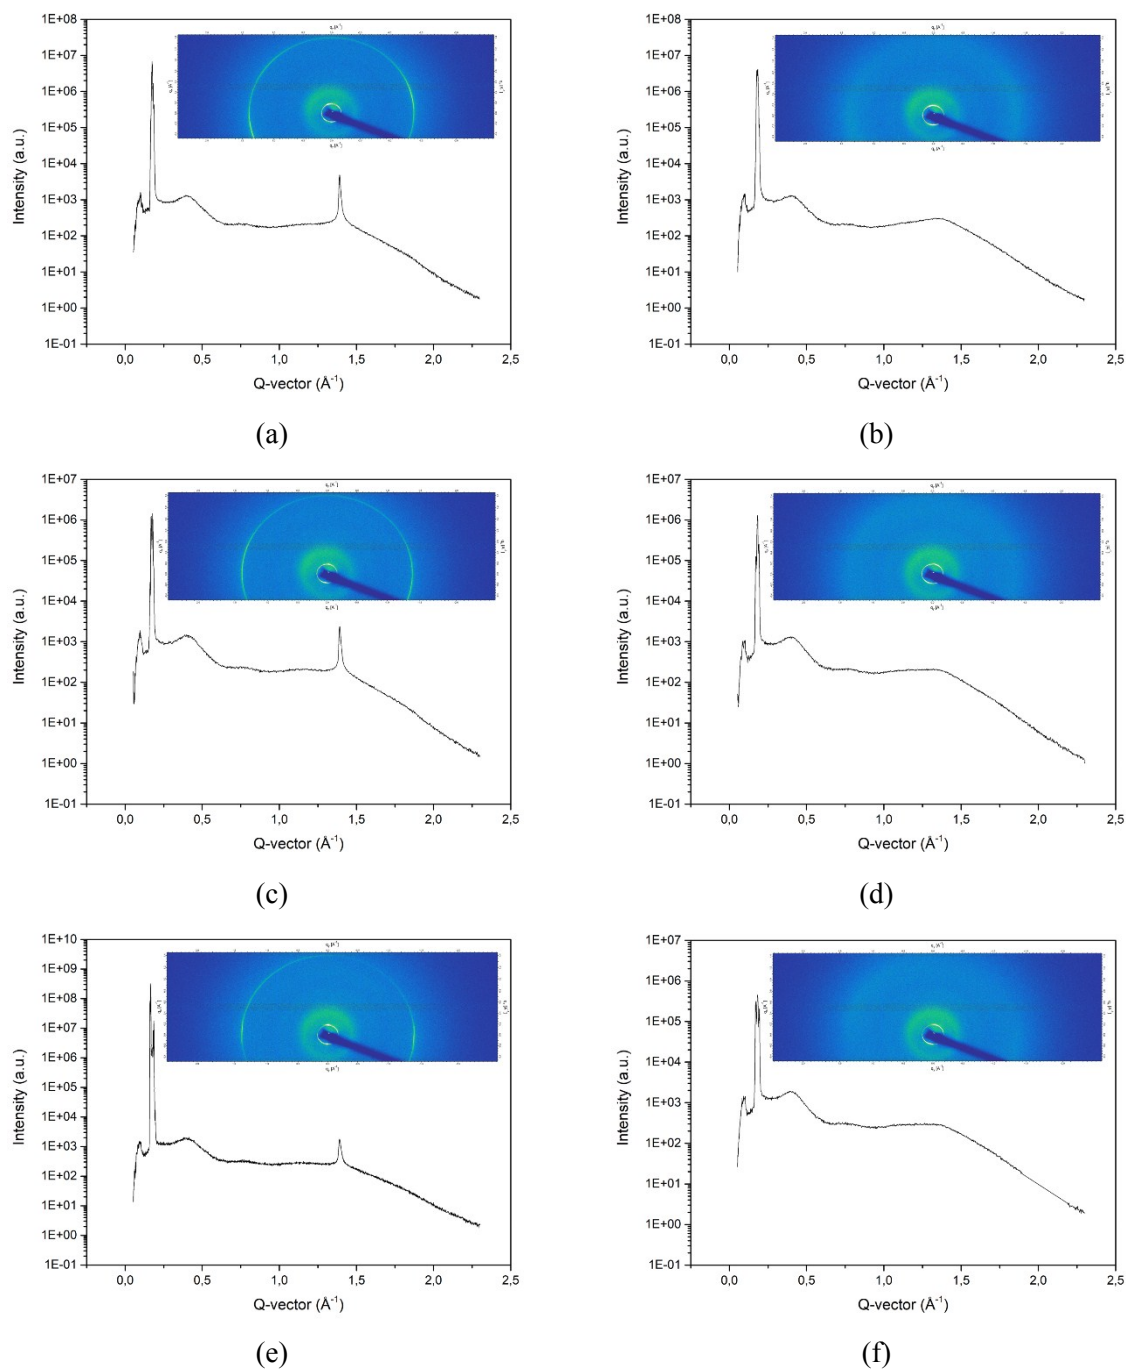

**Figure 3.1** 1D and 2D WAXS data: for pure **8-PNP-O12** (in  $\text{Sm}_B$  (a) and  $\text{Sm}_A$  (b) mesophase), **c1** (in  $\text{Sm}_B$  (c) and  $\text{Sm}_A$  (d) mesophase) and **c2** (in  $\text{Sm}_B$  (e) and  $\text{Sm}_A$  (f) mesophase).  $\text{Sm}_B$  is represented at 85°C, and  $\text{Sm}_A$  at 115°C.



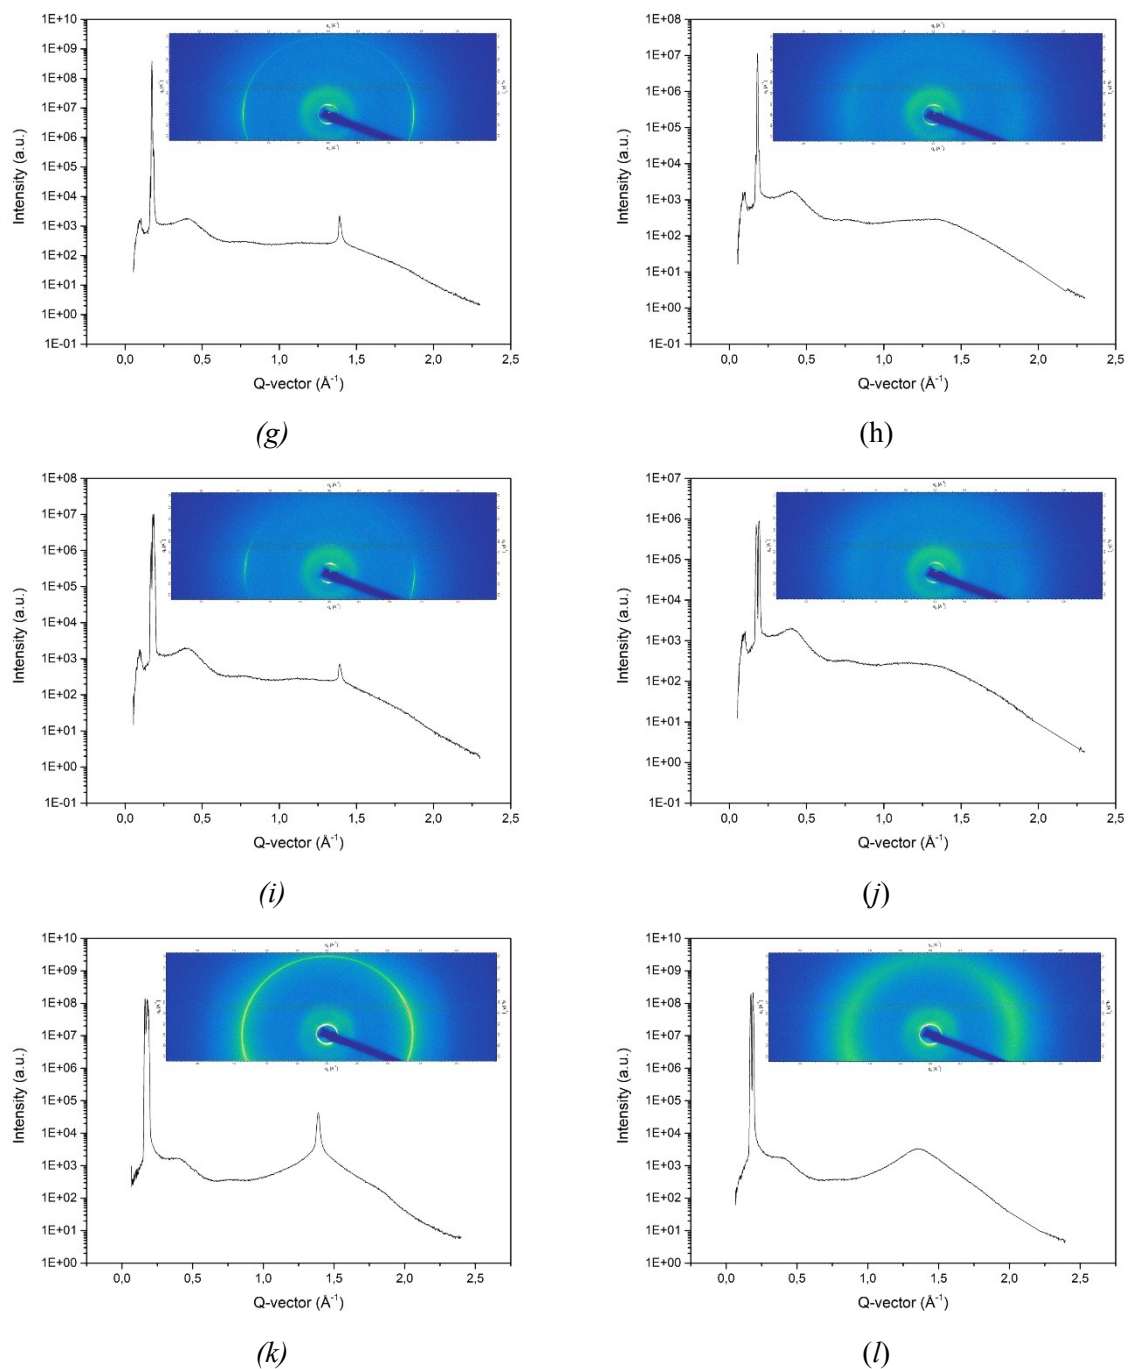

**Figure 3.2** 1D and 2D WAXS data: **c3** (in **Sm<sub>B</sub>** (g) and **Sm<sub>A</sub>** (h) mesophase), **c4** (in **Sm<sub>B</sub>** (i) and **Sm<sub>A</sub>** (j) mesophase), and **c5** (in **Sm<sub>B</sub>** (k) and **Sm<sub>A</sub>** (l) mesophase). **Sm<sub>B</sub>** is represented at 85°C, and **Sm<sub>A</sub>** at 115°C.

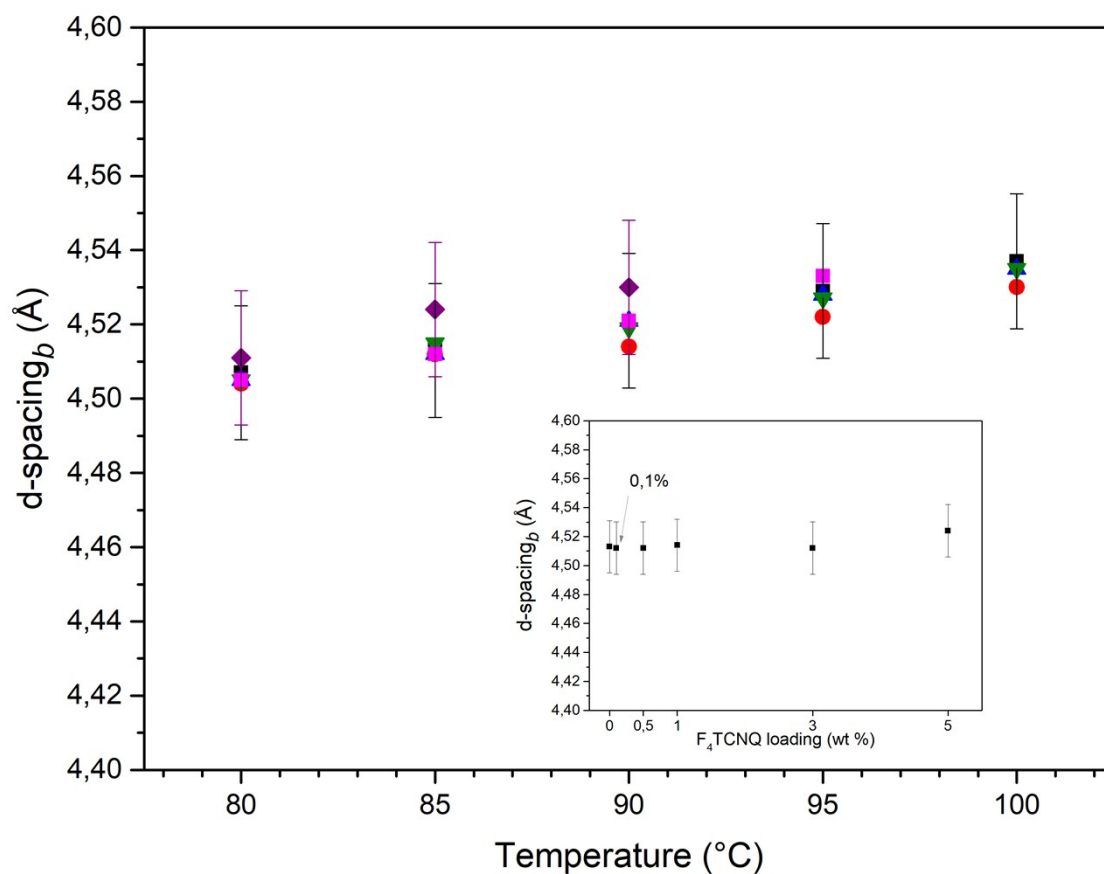

**Figure 3.3** Pseudo-hexagonal order spacing in  $\text{Sm}_B$  mesophase as a function of temperature. Black squares correspond to pure **8-PNP-O12**, red circles – **c1**, blue triangles – **c2**, green triangles – **c3**, magenta squares – **c4**, purple diamonds – **c5**, respectively. Inset: intermolecular  $\text{Sm}_B$  spacing as a function of  $\text{F}_4\text{TCNQ}$  content at 85 °C.

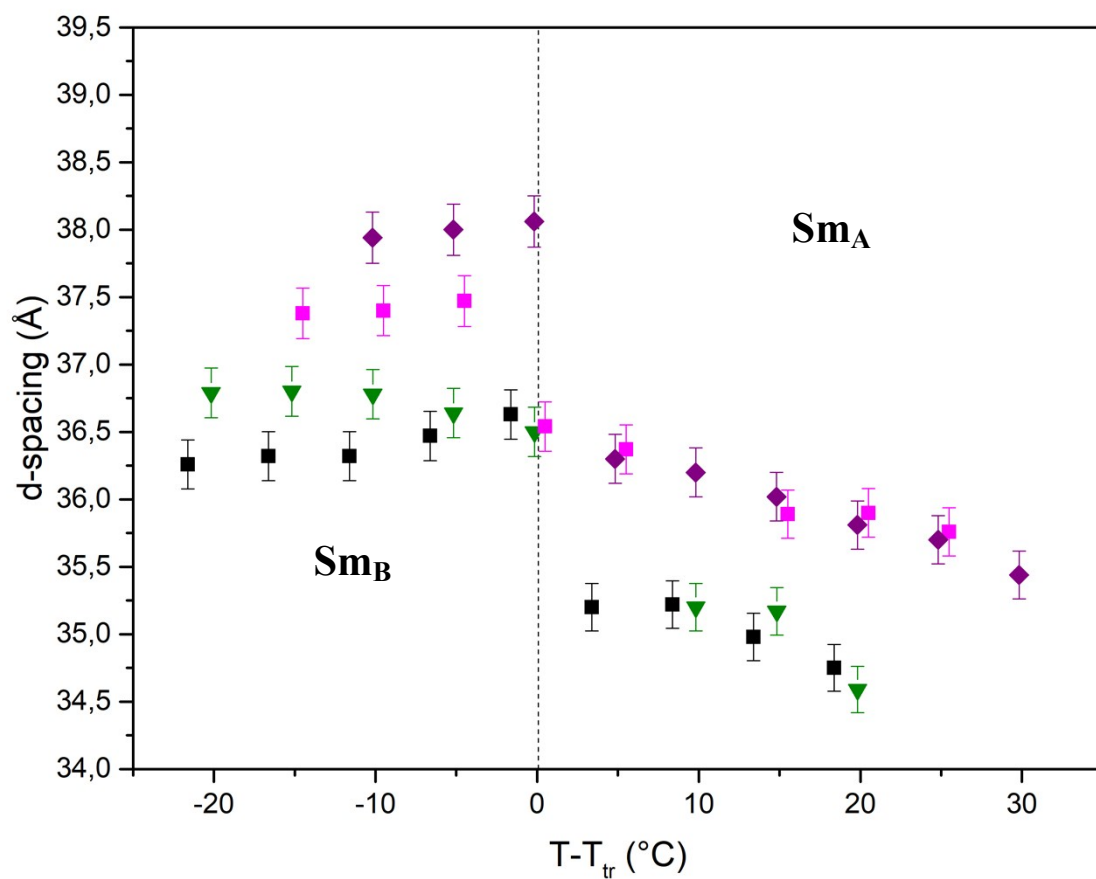

**Figure 3.4** Smectic layer spacing as a function of temperature relative in **Sm<sub>B</sub>** and **Sm<sub>A</sub>** mesophases. Black squares correspond to pure **8-PNP-O12**, green triangles – **c3**, magenta squares – **c4**, purple diamonds – **c5**, respectively.



## Comparison of calculated bond lengths

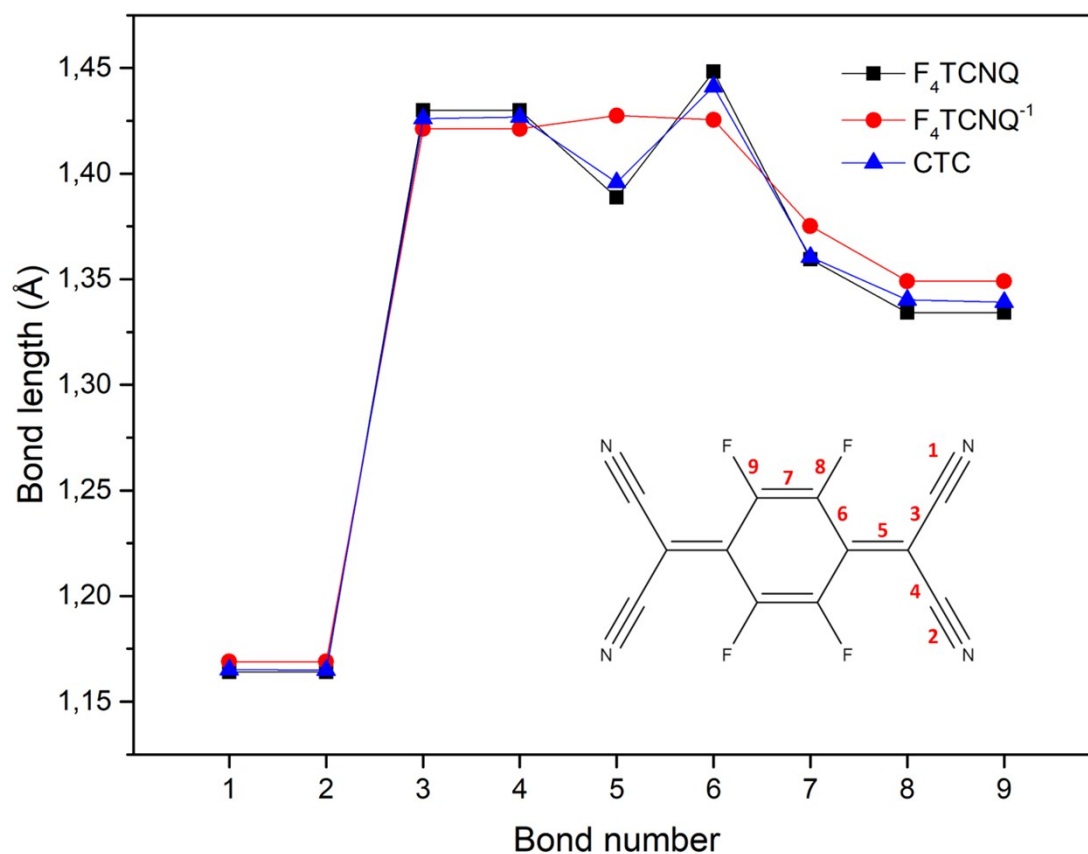

**Figure 4.1** Bond lengths calculated on B3LYP/6-31++G(d,p) level of theory for the isolated neutral  $F_4TCNQ$ , the anion  $F_4TCNQ^{-1}$  and the charge-transfer complex with 8-PNP-O12 (CTC).

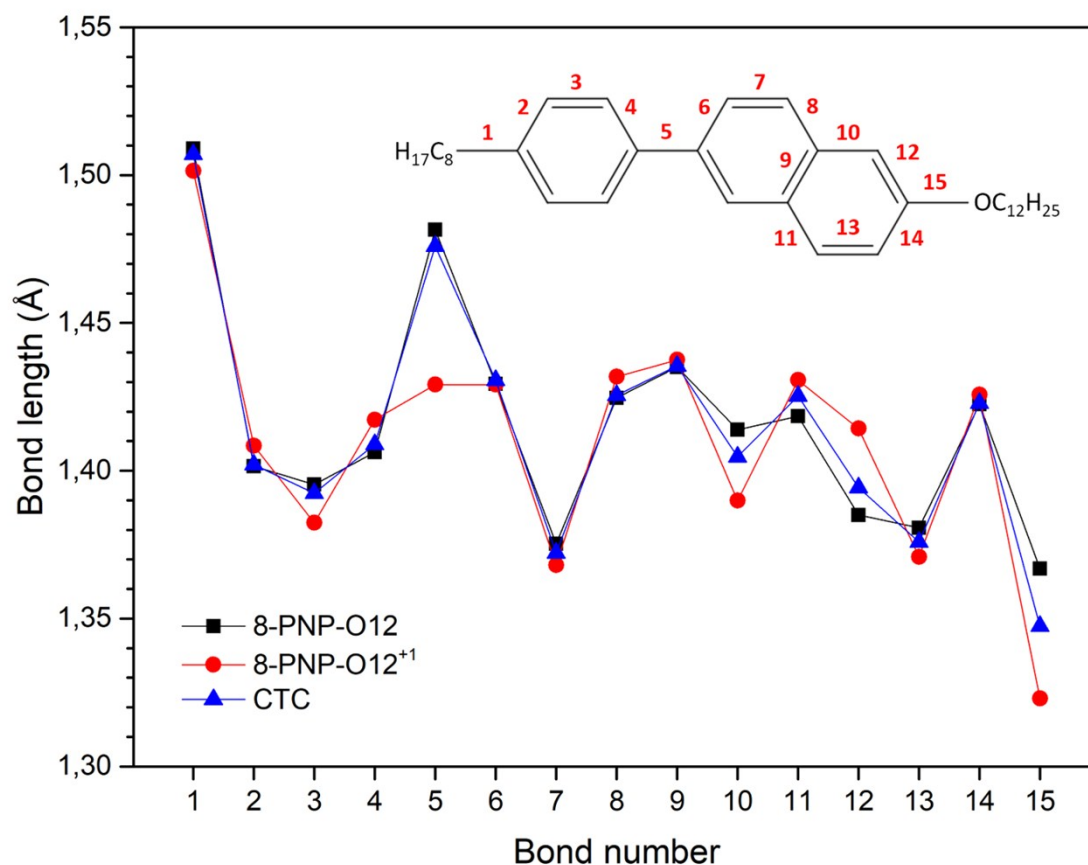

**Figure 4.2** Bond lengths calculated on B3LYP/6-31++G(d,p) level of theory for the isolated neutral **8-PNP-O12**, the cation **8-PNP-O12<sup>+1</sup>** and the charge-transfer complex with **F<sub>4</sub>TCNQ (CTC)**.

## Comparison of Raman spectra before and after annealing

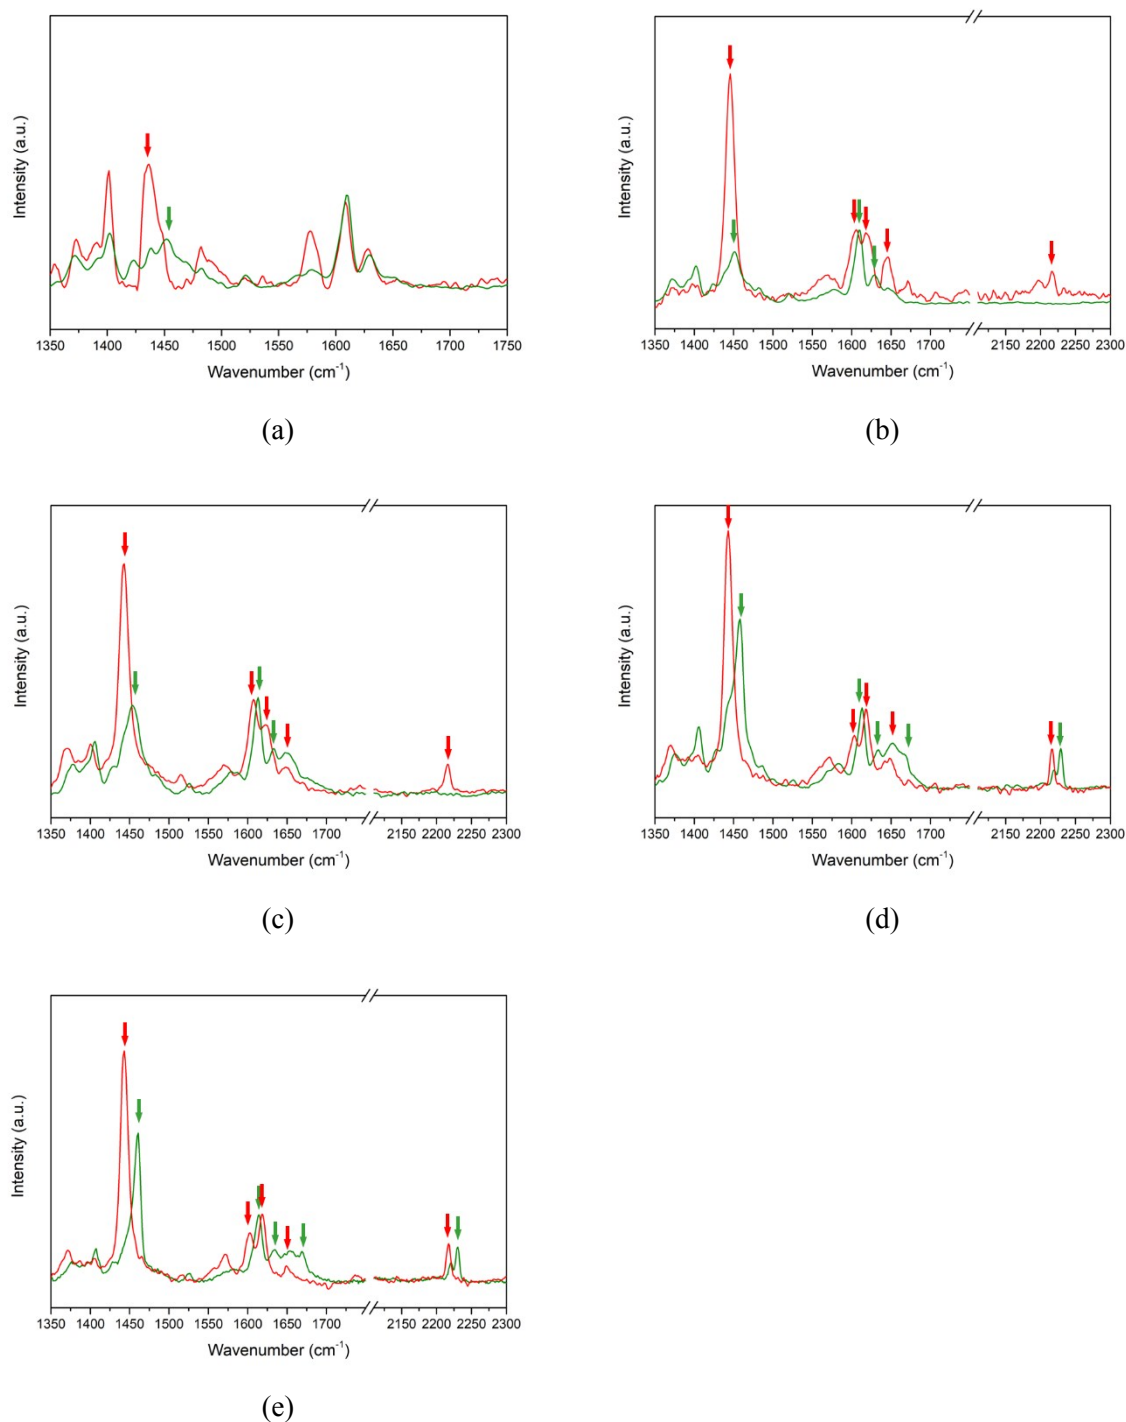

**Figure 5.** Room temperature Raman plots for as-prepared (green) and annealed (red) samples **c1** (a) **c2**(b), **c3** (c), **c4** (d) and **c5** (e). Green and red arrows indicate Raman bands shift for as-prepared and annealed samples, respectively.



## Transient photocurrent plots

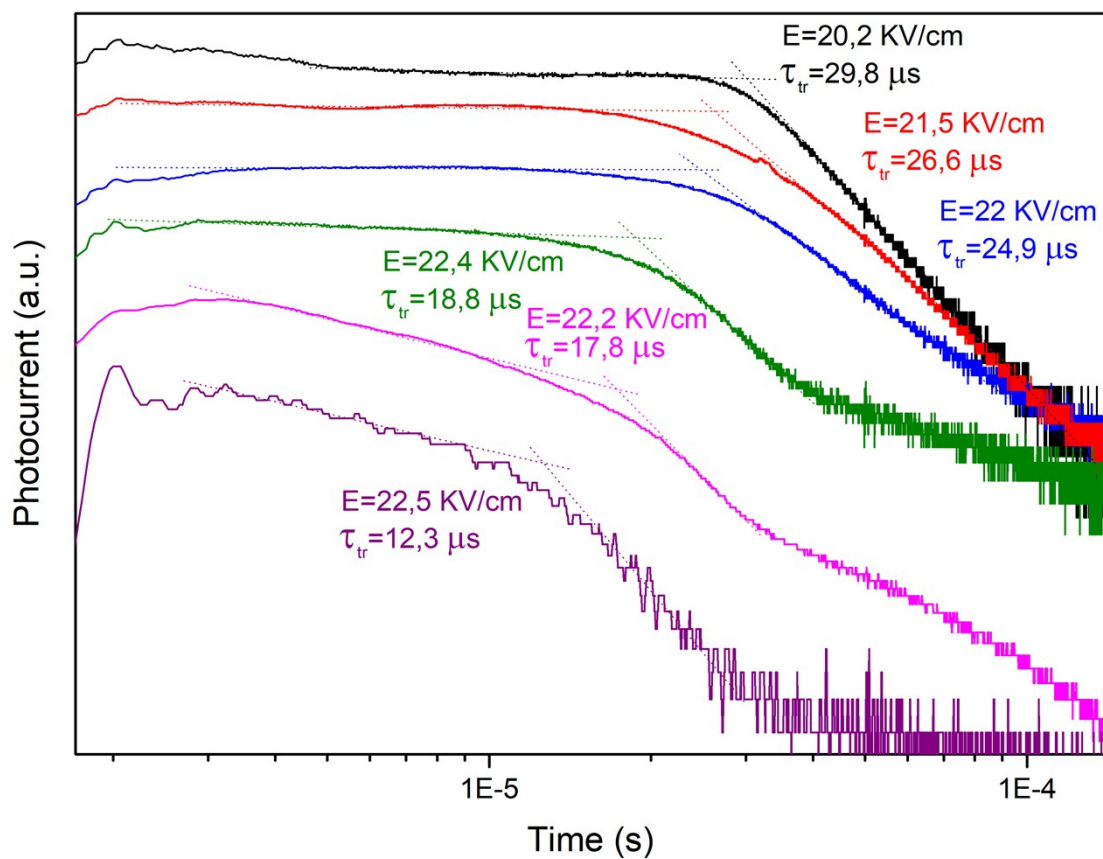

**Figure 6.1** Transient photocurrent plots recorded in  $\text{Sm}_B$  mesophase for pure 8-PNP-O12 (black), c1 (red), c2 (blue), c3 (green), c4 (pink) and c5 (purple) composites.

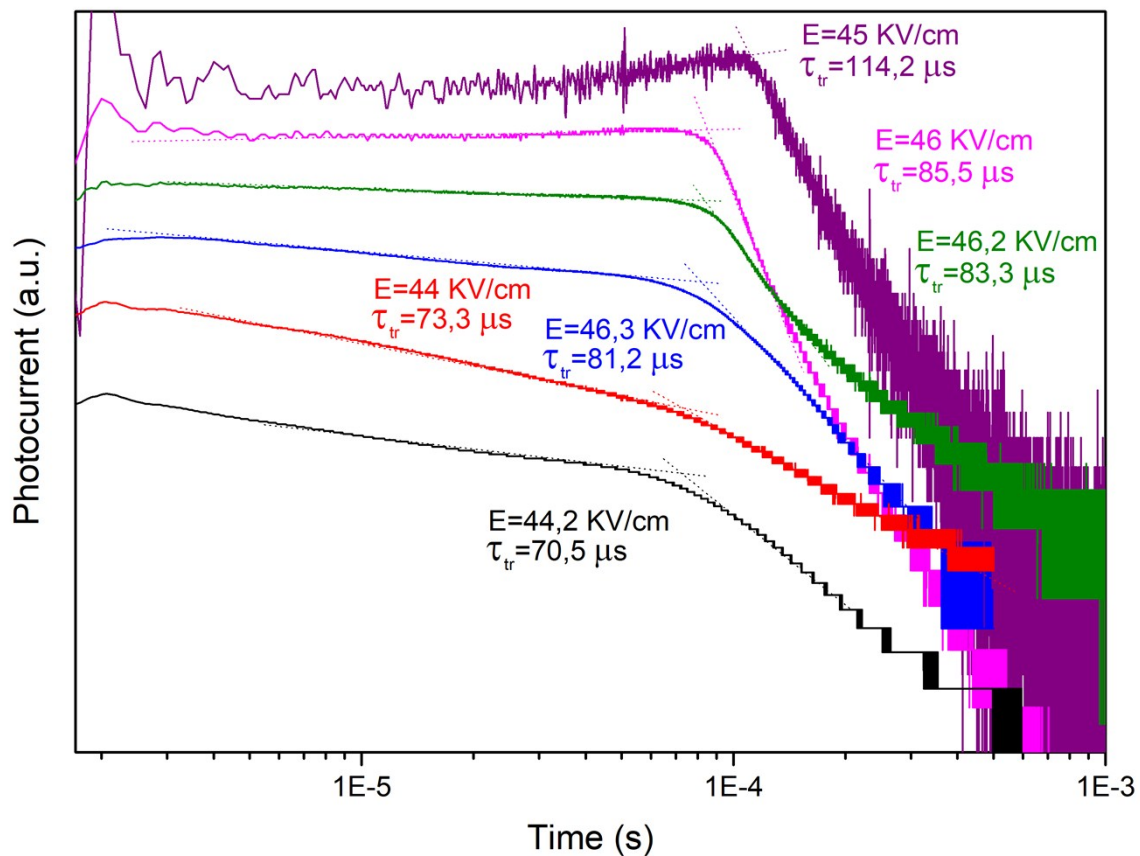

**Figure 6.2** Transient photocurrent plots recorded in  $\text{Sm}_A$  mesophase for pure 8-PNP-O12 (black), c1 (red), c2 (blue), c3 (green), c4 (pink) and c5 (purple) composites.

## Current-voltage plot

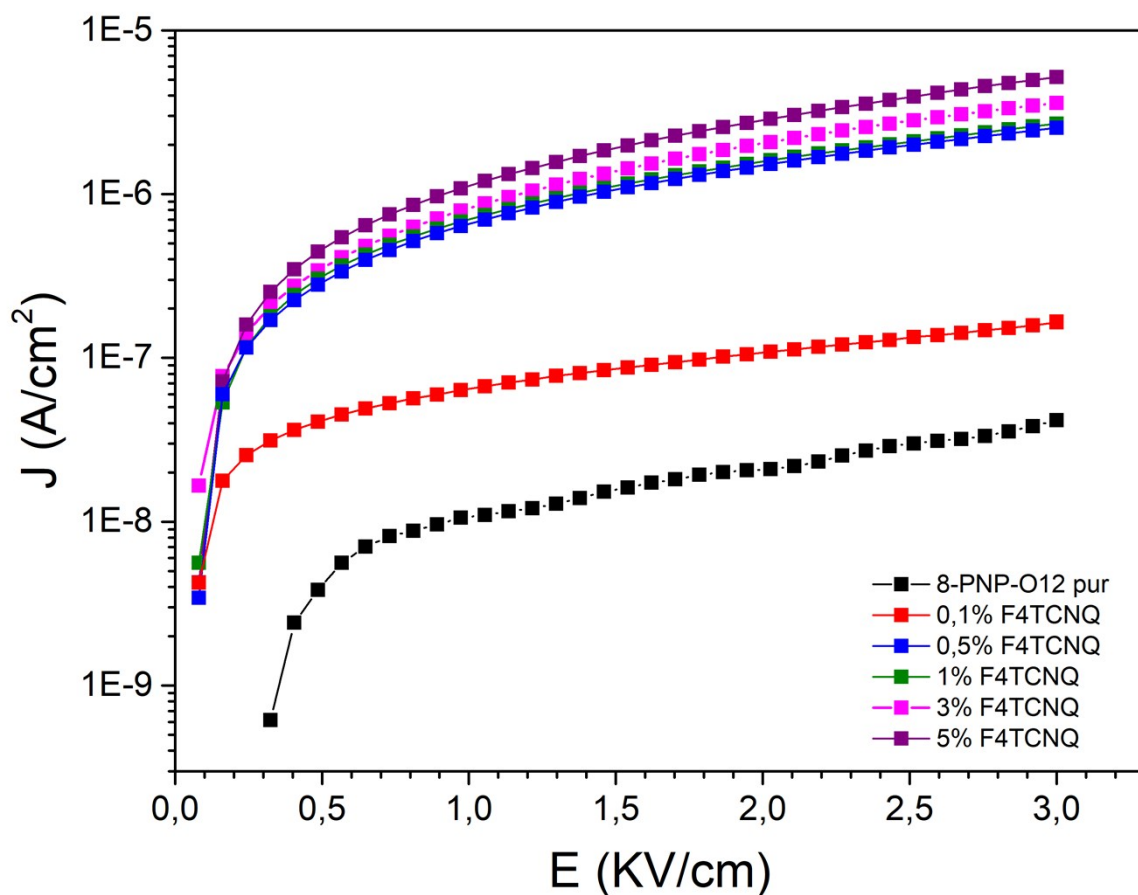

**Figure 7.1.** Current-voltage characteristic of composites sandwiched between **Au** and **ITO** electrodes recorded in crystalline phase for pure **8-PNP-O12** (black), **c1** (red), **c2** (blue), **c3** (green), **c4** (pink) and **c5** (purple) composites.



## Conductivity plot

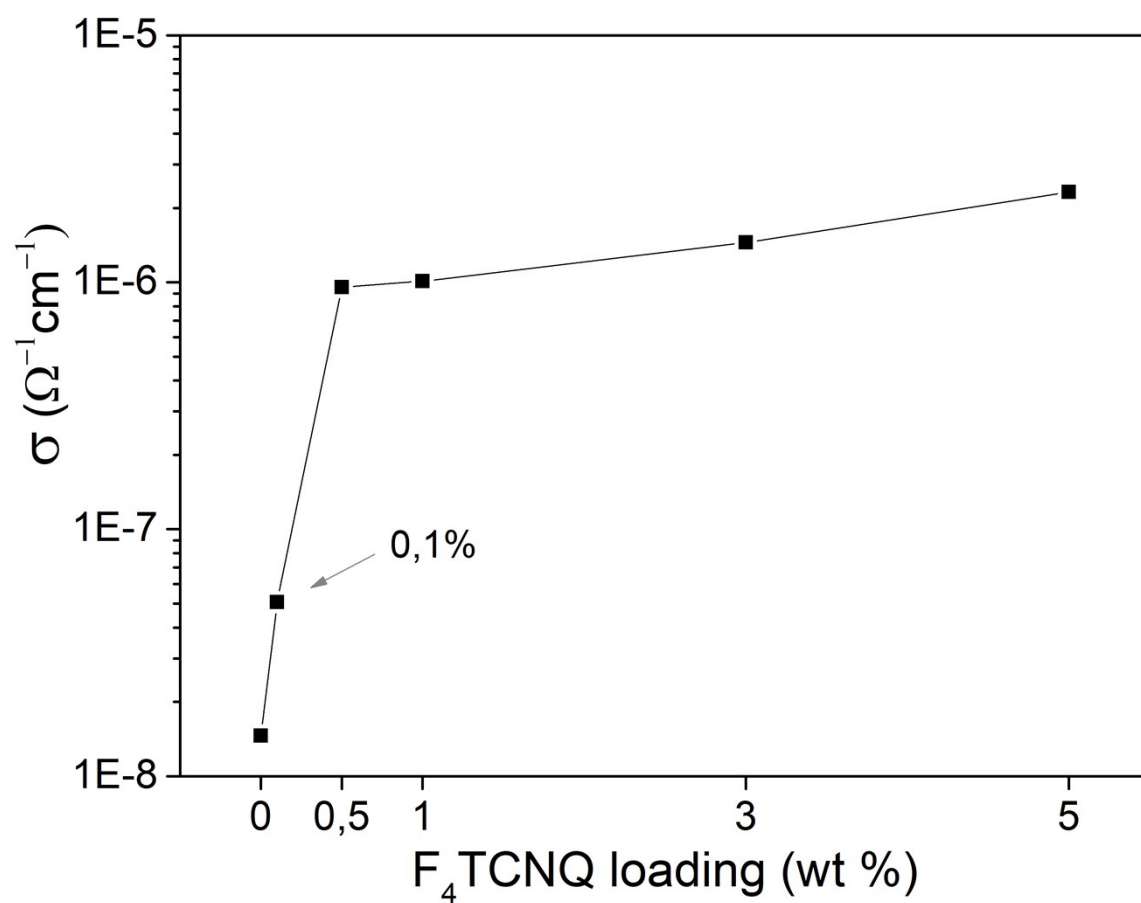

**Figure 7.2.** Conductivity of composites extracted from current-voltage plot at  $85^\circ\text{C}$ .

## Smectic layer with dopant

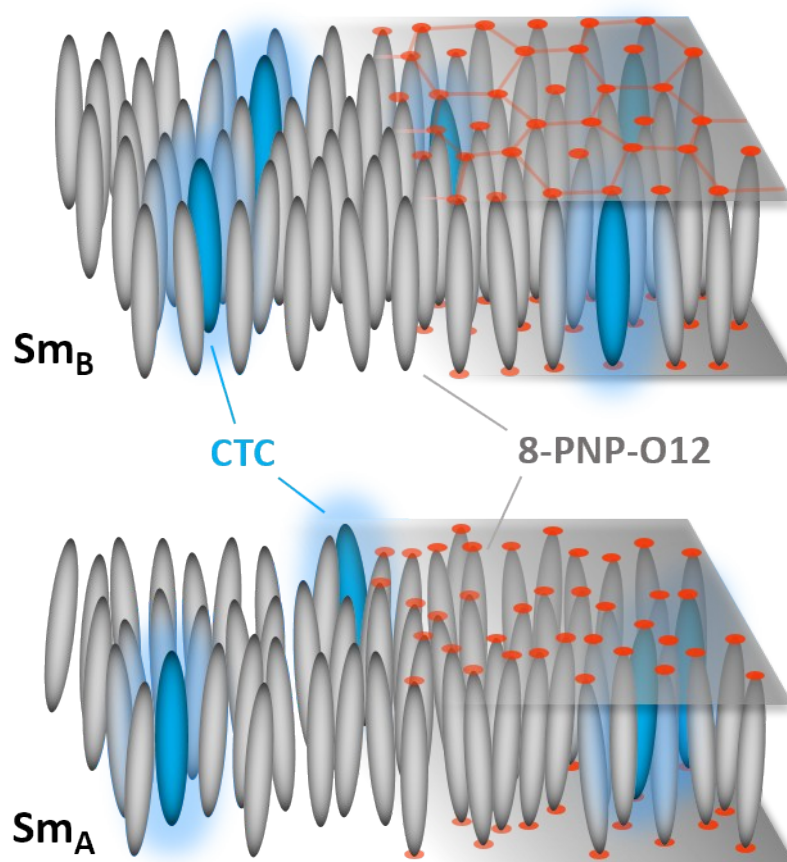

**Figure 8.** Schematic representation of possible **CTC** distribution in a smectic layer of corresponding mesophase of **8-PNP-O12**.
